# Supplementary material
Source: Elsevier journal article supplement (https://discovery-pp.ucl.ac.uk/1466529/2/mmc1.pdf)
Supplement: mmc1 [file mmc1.pdf]

## Supplementary Information

### Diastereoselective synthesis of $\beta$ -aminosulfones from the direct addition to PMP imines

James C. Anderson,\* Ian B. Campbell, Sebastien Campos and Jonathan Shannon

#### **General experimental data:**

Infra-red spectra were recorded on Perkin Elmer Spectrum One FT-IR spectrometers, with absorption reported in wavenumbers ( $\text{cm}^{-1}$ ). Proton magnetic resonance spectra ( $^1\text{H}$  NMR) were recorded at 400 or 600 MHz on Bruker Avance 400 or 600 spectrometers respectively. Chemical shifts ( $\delta$ ) are quoted in parts per million (ppm) and referenced to the residual solvent peak. Carbon magnetic resonance spectra ( $^{13}\text{C}$  NMR) were recorded at 100 or 150 MHz on Bruker Avance 400 or 600 spectrometers respectively. If not specifically stated, the NMR experiments were run at 20 °C. Chemical shifts ( $\delta$ ) are quoted in parts per million (ppm) and referenced to the residual solvent peak. Coupling constants ( $J$ ) are quoted in Hertz (Hz). High resolution mass spectra (HRMS) were recorded on a Bruker Daltonics micrOTOF spectrometer fitted with an electrospray ionisation (ES) source. “Hydrophobic frits” refers to filtration tubes sold by Whatman. Liquid chromatography was by automation using the Flashmaster II available from Argonaut Technologies Ltd, which utilises disposable, normal phase, pre-packed cartridges SPE cartridges. SPE (solid phase extraction) refers to the use of cartridges sold by International Sorbent Technology Ltd. It provides quaternary on-line solvent mixing to enable gradient methods to be run. Samples are queued using the multi-functional open access software, which manages solvents, flow-rates, gradient profile, and collection conditions. The system is equipped with a Knauer variable wavelength uv-detector and two Gilson FC204 fraction-collectors enabling automated peak cutting, collection and tracking.

#### **General Procedure for synthesis of sulfones**

To Sulfone (0.5 mmol, 1 equiv.) in THF (4.0 ml) stirred under nitrogen at -78 °C was added a solution of BuLi (1.0M in hexane, 0.375 mL, 0.600 mmol). The reaction mixture was stirred at -78 °C for 15 mins to give a yellow solution. Then imine (0.600 mmol, 1.2 equiv.) in THF (1.ml) was added slowly and stirred to 1 hr at -78 °C. The reaction mixture was quenched with saturated ammonium chloride (5 ml), and the aqueous layer was extracted with Et<sub>2</sub>O (2 x 20 mL). The organic phase was dried using a hydrophobic frit and evaporated in vacuo to give the crude product which was purified by flash chromatography to isolate the product.

**Table 1**

**Entry1. *N*-(1,3-diphenyl-2-(phenylsulfonyl)propyl)-4-methoxyaniline**

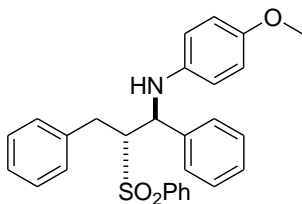

White solid, yield: (78%) m.p. 183-185 °C; <sup>1</sup>H NMR (400 MHz, CDCl<sub>3</sub>): δ<sub>H</sub> 3.21 (1H, dd, *J*=15.6, 4.3, CH<sub>α</sub>), 3.46 (1H, dd, *J*=15.6, 6.5, CH<sub>α</sub>), 3.69-3.74 (1H, m, CHSO<sub>2</sub>), 3.72 (3H, s, OCH<sub>3</sub>), 4.76 (1H, app. br, s, CHNH), 4.87 (1H, br, s, CHNH), 6.44 (2H, d, *J*=9.0, ArH), 6.52-6.64 (2H, m, ArH), 6.70 (2H, d, *J*=9.0, ArH), 6.94-7.10 (3H, m, ArH), 7.14-7.36 (6H, m, ArH), 7.37-7.48 (2H, m, ArH), 7.52-7.64 (1H, m, ArH), 7.79 (2H, d, *J*=7.2, ArH); <sup>13</sup>C NMR (101 MHz, CDCl<sub>3</sub>): δ<sub>C</sub> 28.6 (CH<sub>2</sub>), 55.7 (OCH<sub>3</sub>), 57.9 (CHNH), 71.6 (CHSO<sub>2</sub>), 114.6 (2C, Ar), 115.5 (2C, Ar), 126.3 (Ar), 127.1 (2C, Ar), 127.8 (Ar), 128.2 (2C, Ar), 128.4 (2C, Ar), 128.7 (2C, Ar), 128.9 (2C, Ar), 129.2 (2C, Ar), 133.8 (Ar), 137.9 (q), 138.3 (q), 139.1 (q), 140.8 (q), 152.7 (q); IR (NEAT) 3383 (N-H), 3029 (C-H), 2931 (C-H), 1510 (C=C), 1142 (S=O); HRMS (ES) calcd. for C<sub>28</sub>H<sub>28</sub>NO<sub>3</sub>S<sup>+</sup>, [M + H<sup>+</sup>] 458.1784 found 458.1781.

**Entry 2. 4-methoxy-*N*-(3-phenyl-2-(phenylsulfonyl)-1-(*p*-tolyl)propyl)aniline**

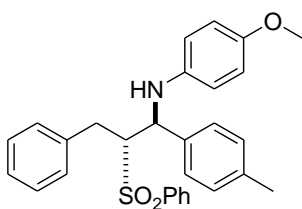

White solid, yield: (60%) m.p. 142-144 °C;  $^1\text{H NMR}$  (400 MHz,  $\text{CDCl}_3$ ):  $\delta_{\text{H}}$  2.39 (3H, s,  $\text{CH}_3$ ), 3.25 (1H, dd,  $J=15.3, 4.3$ ,  $\text{CH}_{2\alpha}$ ), 3.46 (1H, dd,  $J=15.3, 6.7$ ,  $\text{CH}_{2\beta}$ ), 3.73-3.79 (1H, m,  $\text{CHSO}_2$ ), 3.77 (3H, s,  $\text{OCH}_3$ ), 4.78 (1H, d  $J=2.3$ ,  $\text{CHNH}$ ), 4.92 (1H, br,s,  $\text{CHNH}$ ), 6.49 (2H, d,  $J=8.8$ ,  $\text{ArH}$ ), 6.67 (2H, dd,  $J=7.0, 2.3$ ,  $\text{ArH}$ ), 6.71-6.81 (2H, m,  $\text{ArH}$ ), 7.01-7.13 (3H, m,  $\text{ArH}$ ), 7.17 (2H, d,  $J=7.8$ ,  $\text{ArH}$ ), 7.26 (2H, d,  $J=8.0$ ,  $\text{ArH}$ ), 7.46 (2H, t,  $J=7.8$ ,  $\text{ArH}$ ), 7.62 (1H, t,  $J=7.5$ ,  $\text{ArH}$ ), 7.83 (2H, d,  $J=7.3$ ,  $\text{ArH}$ );  $^{13}\text{C NMR}$  (101 MHz,  $\text{CDCl}_3$ ):  $\delta_{\text{C}}$  21.1 ( $\text{CH}_2$ ), 28.7 ( $\text{CH}_2$ ), 55.7 ( $\text{OCH}_3$ ), 57.7 ( $\text{CHNH}$ ), 71.5 ( $\text{CHSO}_2$ ), 114.6 (2C,  $\text{Ar}$ ), 115.5 (2C,  $\text{Ar}$ ), 126.3 ( $\text{Ar}$ ), 127.0 (2C,  $\text{Ar}$ ), 128.2 (2C,  $\text{Ar}$ ), 128.5 (2C,  $\text{Ar}$ ), 128.7 (2C,  $\text{Ar}$ ), 129.1 (2C,  $\text{Ar}$ ), 129.6 (2C,  $\text{Ar}$ ), 133.8 ( $\text{Ar}$ ), 136.0 (q), 137.5 (q), 138.0 (q), 138.3 (q), 140.9 (q), 152.6 (q); **IR** (NEAT) 3383 (N-H), 3029 (C-H), 2931 (C-H), 1511 (C=C), 1142 (S=O); **HRMS** (ES) calcd. for  $\text{C}_{29}\text{H}_{30}\text{NO}_3\text{S}^+$ ,  $[\text{M} + \text{H}^+]$  472.1945 found 472.1941

**Entry 3. N-(1-(4-chlorophenyl)-3-phenyl-2-(phenylsulfonyl)propyl)-4-methoxyaniline**

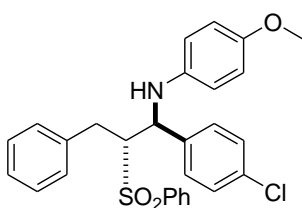

White solid, yield: (71%) m.p. 150-153 °C;  $^1\text{H NMR}$  (400 MHz,  $\text{CDCl}_3$ ):  $\delta_{\text{H}}$  3.15 (1H, dd,  $J=15.4, 5.0$ ,  $\text{CH}_{\alpha}$ ), 3.46 (1H, dd,  $J=15.4, 6.3$ ,  $\text{CH}_{\beta}$ ), 3.68-3.80 (1H, m,  $\text{CHSO}_2$ ), 3.74 (3H, s,  $\text{OCH}_3$ ), 4.76 (1H, d  $J=2.5$ ,  $\text{CHNH}$ ), 4.91 (1H, br,s,  $\text{CHNH}$ ), 6.34-6.50 (2H, m,  $\text{ArH}$ ), 6.55 (2H, dd,  $J=7.3, 2.3$ ,  $\text{ArH}$ ), 6.69-6.77 (2H, m,  $\text{ArH}$ ), 7.01-7.12 (3H, m,  $\text{ArH}$ ), 7.23-7.30 (4H, m,  $\text{ArH}$ ), 7.38-7.50 (2H, m,  $\text{ArH}$ ), 7.55-7.66 (1H, m,  $\text{ArH}$ ), 7.75-7.86 (2H, m,  $\text{ArH}$ );  $^{13}\text{C NMR}$  (101 MHz,  $\text{CDCl}_3$ ):  $\delta_{\text{C}}$  28.9 ( $\text{CH}_2$ ), 55.7 ( $\text{OCH}_3$ ), 57.4 ( $\text{CHNH}$ ), 71.2 ( $\text{CHSO}_2$ ), 114.7 (2C,  $\text{Ar}$ ), 115.5 (2C,  $\text{Ar}$ ), 126.5 ( $\text{Ar}$ ), 128.4 (2C,  $\text{Ar}$ ), 128.4 (2C,  $\text{Ar}$ ),

128.6 (2C, *Ar*), 128.7 (2C, *Ar*), 129.0 (2C, *Ar*), 129.2 (2C, *Ar*), 133.6 (q), 134.0 (*Ar*), 137.6 (q), 137.7 (q), 137.8 (q), 140.4 (q), 152.9 (q); **IR** (NEAT) 3385 (N-H), 3063 (C-H), 2934 (C-H), 1511 (C=C), 1143 (S=O); **HRMS** (CI) calcd. for C<sub>28</sub>H<sub>27</sub>NO<sub>3</sub>SCl<sup>+</sup>, [M + H<sup>+</sup>] 492.1400 found 492.1404.

**Entry 4. 4-methoxy-*N*-(3-phenyl-2-(phenylsulfonyl)-1-(thiophen-3-yl)propyl)aniline**

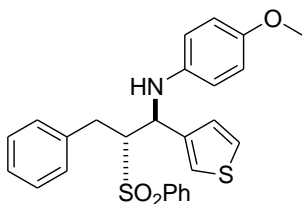

White solid, yield: (78%) m.p. 162-164 °C; **<sup>1</sup>H NMR** (400 MHz, CDCl<sub>3</sub>): δ<sub>H</sub> 3.39 (2H, d, *J*=6.0, CH<sub>2</sub>), 3.79 (3H, s, OCH<sub>3</sub>), 3.87 (1H, app td, *J*=5.8, 2.6, CHSO<sub>2</sub>), 4.98 (1H, br, s, CHNH), 5.12 (1H, app br. s, CHNH), 6.53-6.62 (2H, m, *ArH*), 6.73-6.81 (2H, m, *ArH*), 6.85 (2H, dd, *J*=6.5, 2.8, *ArH*), 7.03 (1H, dd, *J*=5.0, 3.8, *ArH*), 7.09 (1H, d, *J*=3.3, *ArH*), 7.14-7.23 (3H, m, *ArH*), 7.28 (1H, dd, *J*=5.0, 1.0, *ArH*), 7.42-7.52 (2H, m, *ArH*), 7.60-7.66 (1H, m, *ArH*), 7.76-7.84 (2H, m, *ArH*); **<sup>13</sup>C NMR** (101 MHz, CDCl<sub>3</sub>): δ<sub>C</sub> 30.1 (CH<sub>2</sub>), 54.5 (CHNH), 55.6 (OCH<sub>3</sub>), 71.4 (CHSO<sub>2</sub>), 114.7 (2C, *Ar*), 115.7 (2C, *Ar*), 125.1 (*Ar*), 125.2 (*Ar*), 126.6 (*Ar*), 127.3 (*Ar*), 128.4 (2C, *Ar*), 128.6 (2C, *Ar*), 128.6 (2C, *Ar*), 129.1 (2C, *Ar*), 133.8 (*Ar*), 137.7 (q), 138.1 (q), 140.4 (q), 143.7 (q), 153.0 (q); **IR** (NEAT) 3377 (N-H), 3063 (C-H), 2833 (C-H), 1511 (C=C), 1144 (S=O); **HRMS** (CI) calcd. for C<sub>26</sub>H<sub>26</sub>NO<sub>3</sub>S<sub>2</sub><sup>+</sup>, [M + H<sup>+</sup>] 464.1348 found 464.1354.

**Entry 5. *N*-(1-(furan-3-yl)-3-phenyl-2-(phenylsulfonyl)propyl)-4-methoxyaniline**

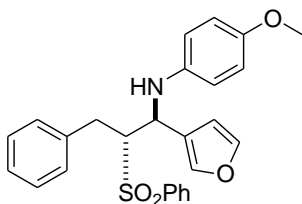

White solid, yield: (87%) m.p. 147-149 °C; **<sup>1</sup>H NMR** (400 MHz, CDCl<sub>3</sub>): δ<sub>H</sub> 3.25 (1H, dd, *J*=14.6, 8.3, CH<sub>α</sub>), 3.35 (1H, dd, *J*=14.6, 5.1, CH<sub>β</sub>), 3.80 (3H, s, OCH<sub>3</sub>), 3.90-4.02 (1H, m, CHSO<sub>2</sub>), 4.75-5.02 (2H, m, CHNH and CHNH), 6.32-6.43 (2H, m, *ArH*), 6.45-

6.56 (2H, m, ArH), 6.71-6.83 (2H, m, ArH), 7.02 (2H, dd,  $J=7.4, 1.6$ , ArH), 7.19-7.30 (3H, m, ArH), 7.32-7.38 (1H, m, ArH), 7.51 (2H, t,  $J=7.8$ , ArH), 7.65 (1H, t,  $J=7.5$ , ArH), 7.76-7.86 (2H, m, ArH);  $^{13}\text{C}$  NMR (101 MHz,  $\text{CDCl}_3$ ):  $\delta_{\text{C}}$  31.5 ( $\text{CH}_2$ ), 52.4 ( $\text{CHNH}$ ), 55.7 ( $\text{OCH}_3$ ), 68.8 ( $\text{CHSO}_2$ ), 109.0 (Ar), 110.6 (Ar), 114.8 (2C, Ar), 115.7 (2C, Ar), 126.9 (Ar), 128.6 (2C, Ar), 128.7 (2C, Ar), 128.9 (2C, Ar), 129.1 (2C, Ar), 133.6 (Ar), 137.1 (q), 138.3 (q), 140.1 (q), 142.0 (Ar), 151.8 (q), 153.0 (q); IR (NEAT) 3378 (N-H), 3063 (C-H), 2834 (C-H), 1511 (C=C), 1144 (S=O); HRMS (ES) calcd. for  $\text{C}_{26}\text{H}_{26}\text{NO}_4\text{S}^+$ ,  $[\text{M} + \text{H}^+]$  448.1577 found 448.1572.

**Entry 6. *N*-(1-(furan-3-yl)-3-phenyl-2-(phenylsulfonyl)propyl)-4-methoxyaniline**

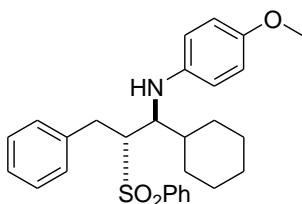

White solid, yield: (73%) m.p. 110-112 °C;  $^1\text{H}$  NMR (400 MHz,  $\text{CDCl}_3$ ):  $\delta_{\text{H}}$  0.83-1.02 (1H, m, CH cyclo), 1.10-1.28 (4H, m, CH cyclo), 1.65-1.84 (5H, m, CH cyclo), 1.99 (1H, d,  $J=12.3$ , ArH), 3.05 (1H, dd,  $J=14.6, 9.3$ ,  $\text{CH}_a$ ), 3.15 (1H, dd,  $J=14.6, 4.3$ ,  $\text{CH}_a$ ), 3.61-3.77 (2H, m,  $\text{CHSO}_2$  and  $\text{CHNH}$ ), 3.81 (3H, s,  $\text{OCH}_3$ ), 3.86 (1H, app. br, s  $\text{CHNH}$ ), 6.42-6.57 (2H, m, ArH), 6.70-6.84 (2H, m, ArH), 6.91-7.05 (2H, m, ArH), 7.20-7.31 (3H, m, ArH), 7.52 (2H, t,  $J=7.8$ , ArH), 7.65 (1H, t,  $J=7.5$ , ArH), 7.79-7.91 (2H, m, ArH);  $^{13}\text{C}$  NMR (101 MHz,  $\text{CDCl}_3$ ):  $\delta_{\text{C}}$  26.2 ( $\text{CH}_2$ ), 26.2 ( $\text{CH}_2$ ), 26.3 ( $\text{CH}_2$ ), 28.9 ( $\text{CH}_2$ ), 31.9 ( $\text{CH}_2$ ), 32.4 ( $\text{CH}_2\text{Ph}$ ), 42.1 (CH), 55.8 ( $\text{OCH}_3$ ), 58.2 ( $\text{CHNH}$ ), 67.6 ( $\text{CHSO}_2$ ), 114.7 (2C, Ar), 114.9 (2C, Ar), 126.8 (Ar), 128.5 (2C, Ar), 128.6 (2C, Ar), 128.7 (2C, Ar), 129.1 (2C, Ar), 133.5 (Ar), 137.6 (q), 139.2 (q), 141.8 (q), 152.1 (q); IR (NEAT) 3385 (N-H), 3030 (C-H), 2933 (C-H), 1511 (C=C); HRMS (CI) calcd. for  $\text{C}_{28}\text{H}_{34}\text{NO}_3\text{S}^+$ ,  $[\text{M} + \text{H}^+]$  464.1354 found 464.1352.

**Entry 7. 4-methoxy-*N*-(1-phenyl-2-(phenylsulfonyl)propyl)aniline**

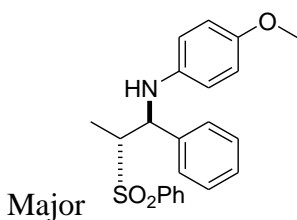

White solid, yield: (55%) m.p. 110-112 °C; **<sup>1</sup>H NMR** (400 MHz, CDCl<sub>3</sub>): δ<sub>H</sub> 1.31 (3H, d, *J*=7.3, CH<sub>3</sub>), 3.36 (1H, qd, *J*=7.3, 2.3, CHSO<sub>2</sub>), 3.69 (3H, s, OCH<sub>3</sub>), 4.59 (1H, br,s, CHNH), 4.73 (1H, d, *J*=2.3, CHNH), 6.32-6.42 (2H, m, ArH), 6.60-6.71 (2H, m, ArH), 7.20-7.37 (5H, m, ArH), 7.51 (2H, t, *J*=7.8, ArH), 7.65 (1H, t, *J*=7.4, ArH), 7.82-7.95 (2H, m, ArH); **<sup>13</sup>C NMR** (101 MHz, CDCl<sub>3</sub>): δ<sub>C</sub> 6.8 (CH<sub>3</sub>), 55.5 (OCH<sub>3</sub>), 57.3 (CHNH), 65.2 (CHSO<sub>2</sub>), 114.6 (2C, Ar), 115.3 (2C, Ar), 126.7 (2C, Ar), 127.7 (Ar), 128.8 (2C, Ar), 128.9 (2C, Ar), 129.2 (2C, Ar), 134.0 (Ar), 137.3 (q), 139.9 (q), 140.8 (q), 152.6 (q); **IR** (NEAT) 3388 (N-H), 2934 (C-H), 1512 (C=C); **HRMS** (ES) calcd. for C<sub>22</sub>H<sub>24</sub>NO<sub>3</sub>S<sup>+</sup>, [M + H<sup>+</sup>] 382.1477 found 382.1481.

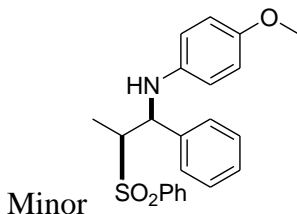

White solid, yield: (30%) m.p. 110-112 °C; **<sup>1</sup>H NMR** (400 MHz, CDCl<sub>3</sub>): δ<sub>H</sub> 1.10 (3H, d, *J*=7.0, CH<sub>3</sub>), 3.39-3.57 (1H, m, CHSO<sub>2</sub>), 3.71 (3H, s, OCH<sub>3</sub>), 4.34 (1H, d, *J*=8.8, CHNH), 5.18 (1H, br,s, CHNH), 6.37-6.54 (2H, m, ArH), 6.61-6.78 (2H, m, ArH), 7.19-7.39 (5H, m, ArH), 7.51 (2H, t, *J*=7.8, ArH), 7.65 (1H, t, *J*=7.4, ArH), 7.75-7.92 (2H, m, ArH); **<sup>13</sup>C NMR** (101 MHz, CDCl<sub>3</sub>): δ<sub>C</sub> 13.5 (CH<sub>3</sub>), 55.7 (OCH<sub>3</sub>), 60.5 (CHNH), 64.9 (CHSO<sub>2</sub>), 114.7 (2C, Ar), 115.3 (2C, Ar), 126.127.6 (2C, Ar), 128.0 (Ar), 128.8 (2C, Ar), 129.0 (2C, Ar), 129.1 (2C, Ar), 133.8 (Ar), 137.5 (q), 140.4 (q), 140.6 (q), 152.5 (q); **IR** (NEAT) 3388 (N-H), 2934 (C-H), 1512 (C=C); **HRMS** (ES) calcd. for C<sub>22</sub>H<sub>24</sub>NO<sub>3</sub>S<sup>+</sup>, [M + H<sup>+</sup>] 382.1477 found 382.1490.
